# Supplementary material for: Surface Response Based Modeling of Liposome Characteristics in a Periodic Disturbance Mixer
Source: Micromachines (Basel). 2020 Feb 25;11(3):235. doi: 10.3390/mi11030235 (PMC7143066; doi:10.3390/mi11030235)
Supplement: Supplementary file 1 [file micromachines-11-00235-s001.zip]

Archive with 9 entries (9 files):
- Supplementary Information.pdf
- Video S1 NTA FRR=1 TFR=18.m4v
- Video S2 NTA FRR=9 TFR=18.m4v
- Video S3 FRR=1 TFR=18.m4v
- Video S4 FRR=3 TFR=18.m4v
- Video S5 FRR=5 TFR=18.m4v
- Video S6 FRR=7 TFR=18.m4v
- Video S7 FRR=9 TFR=18.m4v
- Video S8 FRR=12 TFR=18.m4v
